# Supplementary material for: Fabrication of carbon nanotube (CNT)/poly(3-hydroxybutyrate-co-3-hydroxyhexanoate) (PHBHHx) nanocomposite films for human mesenchymal stem cell (hMSC) differentiation
Source: Royal Society of Chemistry journal article supplement (doi:10.1039/c3py00668a), 2013-01-01
Supplement: c3py00668a.pdf [file c3py00668a.pdf]

Electronic Supplementary Information (ESI)

**Fabrication of Carbon Nanotubes (CNTs)/Poly(3-hydroxybutyrate-co-3-hydroxyhexanoate)  
(PHBHHx) Nanocomposite Films for Human Mesenchymal Stem Cells (hMSCs)**

**Differentiation**

Lin-Ping WU, Mingliang YOU, Danyang WANG, Gongfeng PENG, Zhihui WANG, Guo-Qiang  
CHEN\*

\*Corresponding author:

Guo-Qiang CHEN (G-Q CHEN):

MOE Key Lab of Bioinformatics, Department of Biological Science and Biotechnology, School of  
Life Sciences, Tsinghua-Peking Center for Life Sciences, Tsinghua University, Beijing 100084,  
China

Tel: +86-10-62783844, Fax: +86-10-62794217, E-mail: chengq@mail.tsinghua.edu.cn

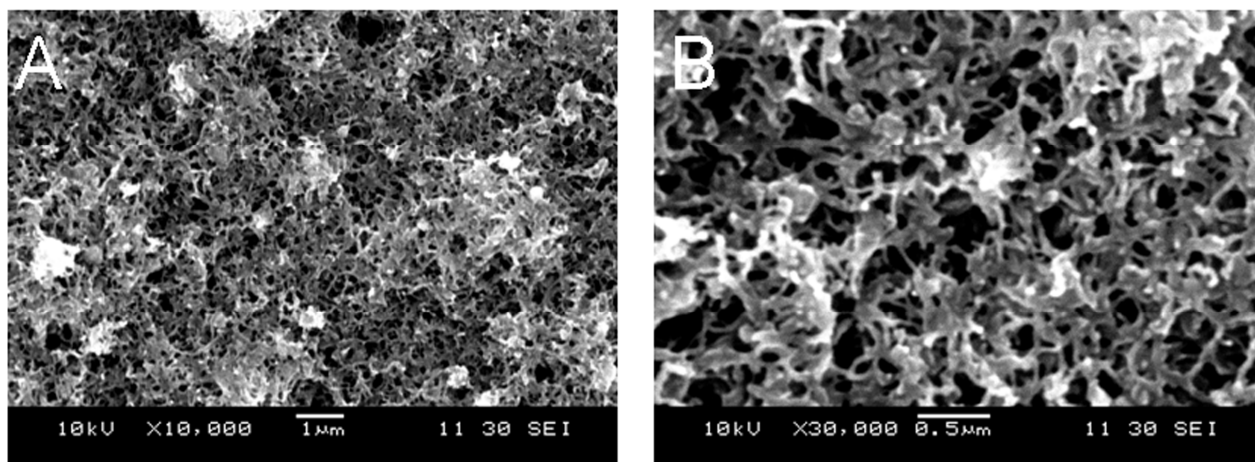

**Fig.S1.** The typical SEM images of the CNTs distribution in nanocomposite after PHBHHx polymer matrix decomposed completely. The 1% CNTs/PHBHHx composite film was heated to 500°C under nitrogen, and hold 5 min until complete degradation of PHBHHx. (A) 10,000 time magnified image, (B) 30,000 time magnified image.
